# Supplementary material for: CisCross: A gene list enrichment analysis to predict upstream regulators in Arabidopsis thaliana
Source: Frontiers journal article supplement (doi:10.3389/fpls.2022.942710), 2022-08-18
Supplement: Image_1.pdf [file Image_1.pdf]

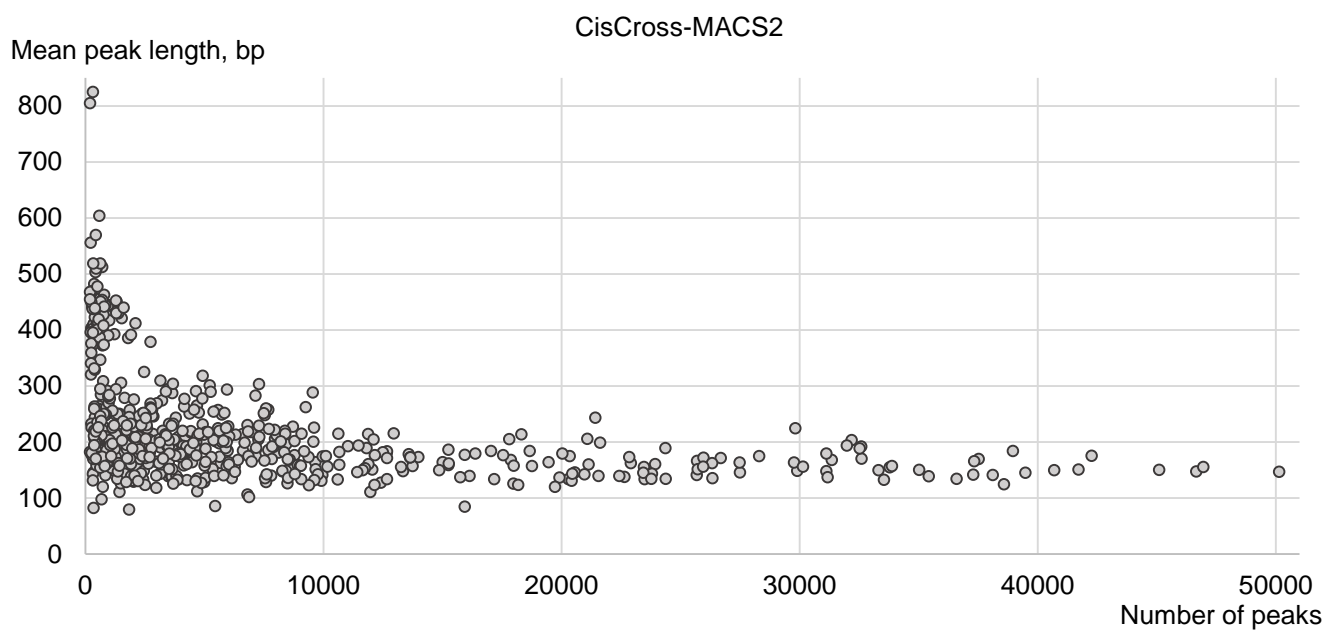

**Figure S1.** An average length of the peak (Y axis) relay to the number of peaks (X axis) in the individual TF peak set from the CisCross-MACS2 collection.
